# Supplementary material for: Photochemical aging of atmospherically reactive organic compounds involving brown carbon at the air-aqueous interface
Source: Copernicus journal article supplement (doi:10.5194/acp-2019-96), 2019-02-01
Supplement: Supplementary file 1 [file acp-2019-96-supplement.pdf]

Supporting information:

Photochemical aging of atmospherically reactive organic compounds involving brown carbon at the air-aqueous interface

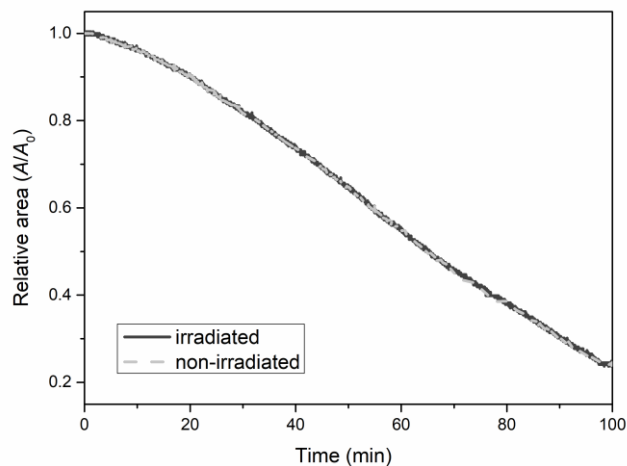

**Figure S1: Relative area ( $A/A_0$ ) relaxation curve of irradiated and non-irradiated DOPC monolayers on artificial seawater.  $A_0$  is the molecular area of monolayer at 25 mN/m.**

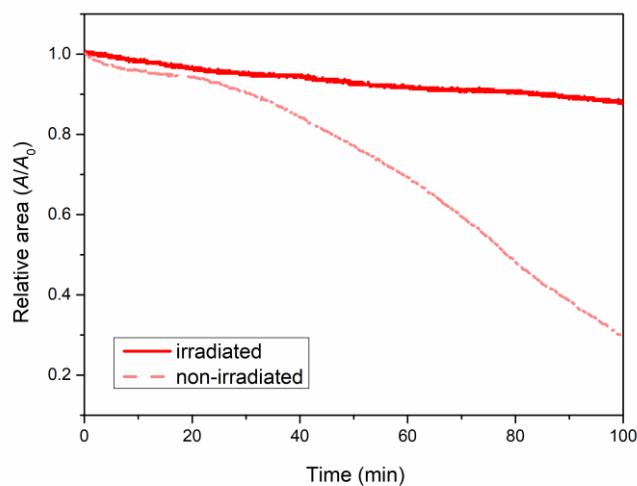

**Figure S2: Relative area ( $A/A_0$ ) relaxation curve of irradiated and non-irradiated DOPC monolayers on artificial seawater containing IC.  $A_0$  is the molecular area of monolayer at 25 mN/m.**

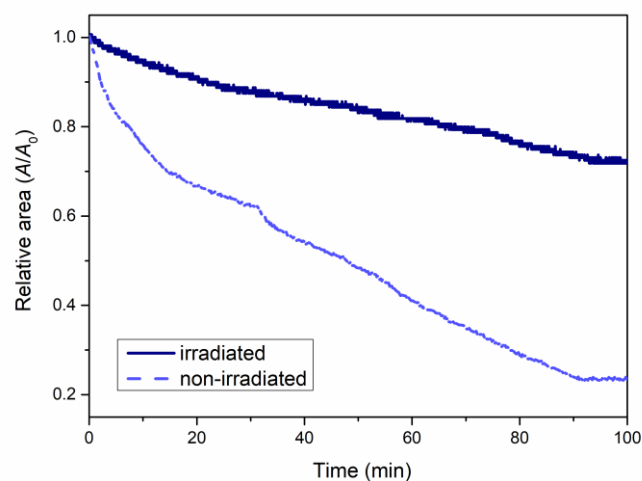

**Figure S3: Relative area ( $A/A_0$ ) relaxation curve of irradiated and non-irradiated DOPC monolayers on artificial seawater containing HA.  $A_0$  is the molecular area of monolayer at 25 mN/m.**

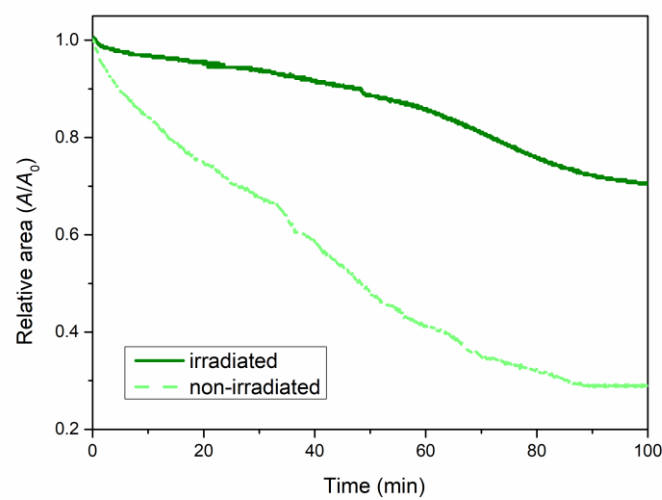

**Figure S4: Relative area ( $A/A_0$ ) relaxation curve of irradiated and non-irradiated DOPC monolayers on artificial seawater containing SOA sample.  $A_0$  is the molecular area of monolayer at 25 mN/m.**

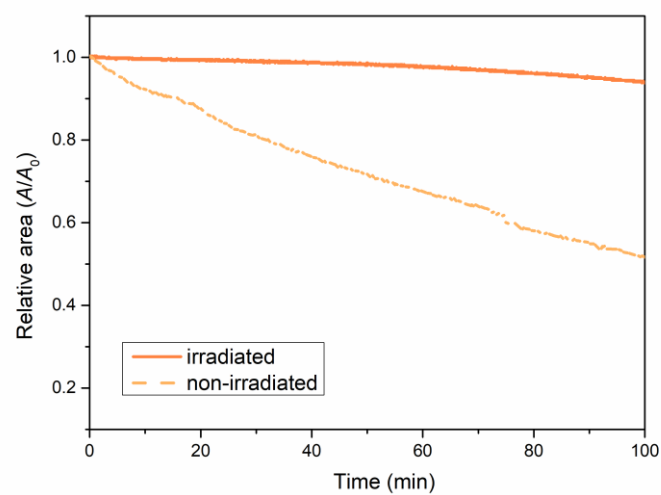

**Figure S5.** Relative area ( $A/A_0$ ) relaxation curve of irradiated and non-irradiated DOPC monolayers on artificial seawater containing  $PM_{2.5}$  sample.  $A_0$  is the molecular area of monolayer at 25 mN/m.

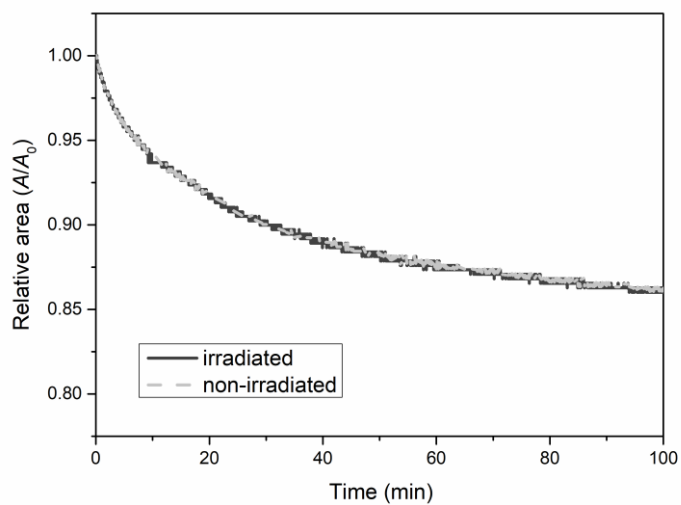

**Figure S6:** Relative area ( $A/A_0$ ) relaxation curve of irradiated and non-irradiated DSPC monolayers on artificial seawater.  $A_0$  is the molecular area of monolayer at 25 mN/m.

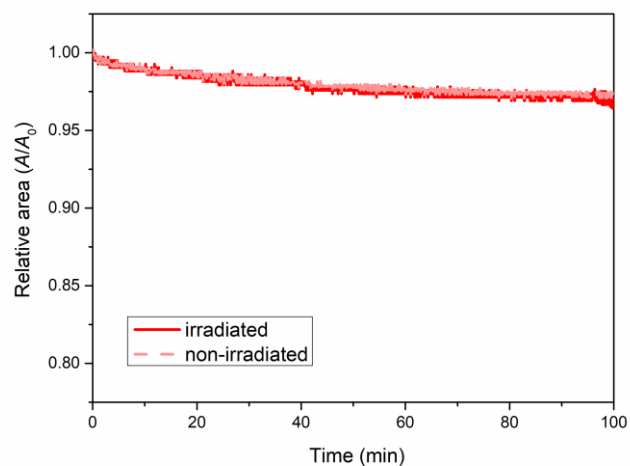

**Figure S7: Relative area ( $A/A_0$ ) relaxation curve of irradiated and non-irradiated DSPC monolayers on artificial seawater containing IC.  $A_0$  is the molecular area of monolayer at 25 mN/m.**

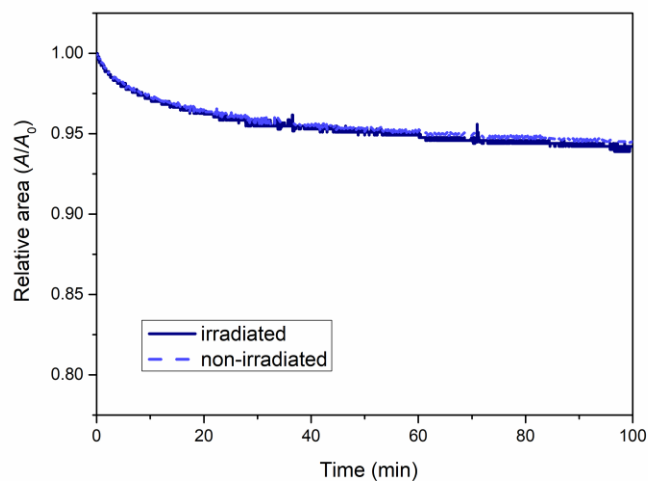

**Figure S8: Relative area ( $A/A_0$ ) relaxation curve of irradiated and non-irradiated DOPC monolayers on artificial seawater containing HA.  $A_0$  is the molecular area of monolayer at 25 mN/m.**
